# Supplementary material for: Mating-Induced Trade-Offs upon Egg Production versus Fertilization and Offspring’s Survival in a Sawfly with Facultative Parthenogenesis
Source: MDPI journal article supplement (doi:10.3390/insects12080693), 2021-08-02
Supplement: s1 [file s1]

**Table S1** Primers for quantitative realtime PCR

| Gene ID              | Forward Primer (5' to 3')  | Reverse Primer (5' to 3') |
|----------------------|----------------------------|---------------------------|
| <i>β-Tubulin</i>     | CATCCAGAACAAGAACAGCTCG     | ACGGGGAGGAATGTCACAAACA    |
| <i>DN64818_c0_g6</i> | TGAATTGGGAAATCAGTAGCACTGTC | TGTTTGAGCCTTGACACAAA      |
| <i>DN70573_c2_g1</i> | AGTGACCACCCTTGCGATGC       | TGCCTCCCATCAGACACCGA      |
| <i>DN60391_c5_g2</i> | TGACGGTCTGGACCACCCAA       | GCAGACTCGGAAGGCACCAT      |
| <i>DN69705_c1_g3</i> | CCCTAAGGCGAGGCCGAAAG       | GCTTCAGCACCGTAGTGCCT      |
| <i>DN53654_c1_g7</i> | CATCCGGCGGTTTGTACTGC       | CCGTGACCCGCAATCACTGT      |
| <i>DN54310_c0_g6</i> | TCAAACAGACGCGCAAGGGA       | TCGGGTCCAAACAGGCACAC      |
| <i>DN65013_c0_g1</i> | TCCACTCCATACTGTTGGGATCA    | AGTTTGGCTCCAGTTCAGTAAACA  |
| <i>DN62024_c1_g1</i> | GGGAGACTGTACTGCGAAGC       | TGCAAATCATTCAAGTTCCAACCA  |
| <i>DN52313_c1_g5</i> | GTGCTCTTGGACACTCCCAT       | CCGTGCCGTTGTTGAAAAGA      |
| <i>DN65191_c2_g1</i> | GCGCTCGGACATGAATTTGC       | CCACCACAGCCTGCTACAAG      |
| <i>DN66978_c2_g1</i> | TCGTTGTAAGAAGCAGCTCGT      | TGTCAGATGTCGCAGGATGGA     |
| <i>DN78694_c0_g1</i> | ATTCGGCGATGGTTGAGTCG       | TTGGGCTGGCGAATTCACA       |
| <i>DN63597_c1_g1</i> | GGAGCACCATGTGGCATACT       | TTGCGAGAATGTGGTGGTGA      |
| <i>DN62024_c1_g1</i> | GGGAGACTGTACTGCGAAGC       | TGCAAATCATTCAAGTTCCAACCA  |
| <i>DN65013_c0_g1</i> | TCCACTCCATACTGTTGGGATCA    | AGTTTGGCTCCAGTTCAGTAAACA  |
| <i>DN57206_c6_g2</i> | ATGAGCATCCGCCCTCTCCT       | TTGTCCACCACGCTCACCAC      |
| <i>DN71364_c1_g1</i> | TACCACGTTGGTCGACATGC       | CCAGCTTGTGCTCCTGGATG      |
| <i>DN70765_c7_g9</i> | GCTCCAGCATCCTTCGTAGC       | GCCTTCCTCGGACAGGAGAT      |
| <i>DN67787_c1_g2</i> | AACCGTCGGCATGGAGTGTG       | GTGCAGAGGCAGCACAGGTT      |
| <i>DN68243_c0_g3</i> | TGCACATTGAATGGCGCTTAGA     | TCCCTTGAACCTCTCTCCAACAGT  |
| <i>DN65710_c6_g4</i> | AAGCGAAAGAACGCGATGGT       | TTCAACAGGTGAGCGCAGAG      |
| <i>DN56824_c0_g2</i> | GATGCAGCCTGGATGCTGTT       | CGCCCATCAACGTCACATCA      |
| <i>DN51116_c1_g5</i> | GCGTACGACCCAAGCTTCAA       | GTCCGTCAACGGTCTTCTGG      |
| <i>DN45576_c0_g1</i> | TACGCCAGCACTGTTGACAC       | TGGCAAGTTCAAGGCTGTCC      |

**Table S2** Summary of the quality of all sample sequencing data

| #Sample_ID | Clean_Reads | A%    | T%    | C%    | G%    | N% | Error% | Q20%  | Q30%  | GC%   |
|------------|-------------|-------|-------|-------|-------|----|--------|-------|-------|-------|
| V1h-1      | 48732506    | 31.67 | 31.35 | 18.27 | 18.7  | 0  | 0.0248 | 97.97 | 94.54 | 36.97 |
| V1h-2      | 54865402    | 29.6  | 29.15 | 20.35 | 20.9  | 0  | 0.0251 | 97.78 | 94.27 | 41.25 |
| V6h-1      | 51945192    | 29.01 | 28.61 | 20.91 | 21.46 | 0  | 0.0248 | 97.89 | 94.53 | 42.38 |
| V6h-2      | 50279316    | 29.54 | 29.14 | 20.34 | 20.97 | 0  | 0.0247 | 97.99 | 94.66 | 41.32 |
| V24h-1     | 54548534    | 31.38 | 30.95 | 18.55 | 19.12 | 0  | 0.0248 | 97.9  | 94.51 | 37.67 |
| V24h-2     | 55232694    | 28.92 | 28.46 | 20.97 | 21.64 | 0  | 0.0247 | 97.93 | 94.62 | 42.61 |
| V24h-3     | 50962894    | 29.08 | 28.67 | 20.73 | 21.51 | 0  | 0.0248 | 97.89 | 94.53 | 42.24 |
| M1h-1      | 49009592    | 30.12 | 29.8  | 19.77 | 20.31 | 0  | 0.0252 | 97.76 | 94.1  | 40.08 |
| M1h-2      | 44700996    | 29.76 | 29.35 | 20.17 | 20.72 | 0  | 0.0247 | 97.94 | 94.64 | 40.89 |
| M1h-3      | 50686434    | 28.3  | 27.95 | 21.57 | 22.18 | 0  | 0.025  | 97.81 | 94.45 | 43.74 |
| M6h-1      | 47074780    | 30.48 | 30.08 | 19.37 | 20.06 | 0  | 0.0244 | 98.11 | 94.95 | 39.44 |
| M6h-2      | 46133412    | 30.42 | 29.96 | 19.45 | 20.16 | 0  | 0.0245 | 98.02 | 94.91 | 39.62 |
| M6h-3      | 51454412    | 30.08 | 29.61 | 19.85 | 20.46 | 0  | 0.0244 | 98.11 | 94.97 | 40.31 |
| M24h-1     | 47917526    | 30.76 | 30.35 | 19.08 | 19.81 | 0  | 0.0245 | 98.02 | 94.88 | 38.89 |
| M24h-2     | 48694016    | 30.86 | 30.51 | 19.04 | 19.59 | 0  | 0.0241 | 98.21 | 95.21 | 38.63 |
| M24h-3     | 47228838    | 28.93 | 28.57 | 20.97 | 21.53 | 0  | 0.0244 | 98.08 | 94.9  | 42.5  |

**Table S3** Pearson's correlation coefficient

|        | V1h-1 | V1h-2 | V6h-1 | V6h-2 | V24h-1 | V24h-2 | V24h-3 | M1h-1 | M1h-2 | M1h-3 | M6h-1 | M6h-2 | M6h-3 | M24h-1 | M24h-2 | M24h-3 |
|--------|-------|-------|-------|-------|--------|--------|--------|-------|-------|-------|-------|-------|-------|--------|--------|--------|
| V1h-1  | 1     | 0.923 | 0.955 | 0.878 | 0.767  | 0.846  | 0.796  | 0.885 | 0.892 | 0.802 | 0.959 | 0.806 | 0.876 | 0.841  | 0.854  | 0.865  |
| V1h-2  | 0.923 | 1     | 0.978 | 0.988 | 0.784  | 0.902  | 0.823  | 0.939 | 0.954 | 0.901 | 0.956 | 0.945 | 0.981 | 0.955  | 0.974  | 0.988  |
| V6h-1  | 0.955 | 0.978 | 1     | 0.967 | 0.776  | 0.892  | 0.803  | 0.921 | 0.936 | 0.871 | 0.977 | 0.906 | 0.961 | 0.91   | 0.936  | 0.961  |
| V6h-2  | 0.878 | 0.988 | 0.967 | 1     | 0.772  | 0.895  | 0.816  | 0.943 | 0.946 | 0.915 | 0.941 | 0.962 | 0.979 | 0.963  | 0.982  | 0.992  |
| V24h-1 | 0.767 | 0.784 | 0.776 | 0.772 | 1      | 0.962  | 0.983  | 0.921 | 0.912 | 0.816 | 0.762 | 0.768 | 0.772 | 0.863  | 0.824  | 0.76   |
| V24h-2 | 0.846 | 0.902 | 0.892 | 0.895 | 0.962  | 1      | 0.971  | 0.973 | 0.976 | 0.874 | 0.85  | 0.852 | 0.874 | 0.945  | 0.91   | 0.886  |
| V24h-3 | 0.796 | 0.823 | 0.803 | 0.816 | 0.983  | 0.971  | 1      | 0.945 | 0.942 | 0.845 | 0.795 | 0.811 | 0.812 | 0.906  | 0.863  | 0.802  |
| M1h-1  | 0.885 | 0.939 | 0.921 | 0.943 | 0.921  | 0.973  | 0.945  | 1     | 0.995 | 0.932 | 0.911 | 0.923 | 0.934 | 0.978  | 0.957  | 0.937  |
| M1h-2  | 0.892 | 0.954 | 0.936 | 0.946 | 0.912  | 0.976  | 0.942  | 0.995 | 1     | 0.925 | 0.919 | 0.916 | 0.935 | 0.98   | 0.958  | 0.942  |
| M1h-3  | 0.802 | 0.901 | 0.871 | 0.915 | 0.816  | 0.874  | 0.845  | 0.932 | 0.925 | 1     | 0.881 | 0.935 | 0.934 | 0.937  | 0.947  | 0.924  |
| M6h-1  | 0.959 | 0.956 | 0.977 | 0.941 | 0.762  | 0.85   | 0.795  | 0.911 | 0.919 | 0.881 | 1     | 0.928 | 0.963 | 0.894  | 0.936  | 0.943  |
| M6h-2  | 0.806 | 0.945 | 0.906 | 0.962 | 0.768  | 0.852  | 0.811  | 0.923 | 0.916 | 0.935 | 0.928 | 1     | 0.981 | 0.939  | 0.987  | 0.957  |
| M6h-3  | 0.876 | 0.981 | 0.961 | 0.979 | 0.772  | 0.874  | 0.812  | 0.934 | 0.935 | 0.934 | 0.963 | 0.981 | 1     | 0.945  | 0.987  | 0.983  |
| M24h-1 | 0.841 | 0.955 | 0.91  | 0.963 | 0.863  | 0.945  | 0.906  | 0.978 | 0.98  | 0.937 | 0.894 | 0.939 | 0.945 | 1      | 0.971  | 0.961  |
| M24h-2 | 0.854 | 0.974 | 0.936 | 0.982 | 0.824  | 0.91   | 0.863  | 0.957 | 0.958 | 0.947 | 0.936 | 0.987 | 0.987 | 0.971  | 1      | 0.977  |
| M24h-3 | 0.865 | 0.988 | 0.961 | 0.992 | 0.76   | 0.886  | 0.802  | 0.937 | 0.942 | 0.924 | 0.943 | 0.957 | 0.983 | 0.961  | 0.977  | 1      |
